# Supplementary material for: Training and Toolkit Resources to Support Implementation of a Community Pharmacy Fall Prevention Service
Source: Pharmacy (Basel). 2019 Aug 9;7(3):113. doi: 10.3390/pharmacy7030113 (PMC6789452; doi:10.3390/pharmacy7030113)
Supplement: Supplementary file 1 [file pharmacy-07-00113-s001.pdf]

**Table S1.** Implementation training and resources.

| <b>STEP 1: ONBOARD TRAINING</b>                                                                                                                                                                                         |                                                                                                                |
|-------------------------------------------------------------------------------------------------------------------------------------------------------------------------------------------------------------------------|----------------------------------------------------------------------------------------------------------------|
| <b>TOOLKIT REVIEW</b>                                                                                                                                                                                                   |                                                                                                                |
| 66-page toolkit mailed to pharmacies three weeks prior to live implementation. Pharmacy project champions were required to review toolkit prior to site visit.                                                          |                                                                                                                |
| Contents:                                                                                                                                                                                                               |                                                                                                                |
| 1.                                                                                                                                                                                                                      | Checklist of training activities                                                                               |
| 2.                                                                                                                                                                                                                      | Study overview                                                                                                 |
| •                                                                                                                                                                                                                       | Study objectives                                                                                               |
| •                                                                                                                                                                                                                       | Introduction to research team members                                                                          |
| •                                                                                                                                                                                                                       | Glossary of key terms                                                                                          |
| •                                                                                                                                                                                                                       | Project timeline                                                                                               |
| 3.                                                                                                                                                                                                                      | Fall prevention service                                                                                        |
| •                                                                                                                                                                                                                       | Background information                                                                                         |
| •                                                                                                                                                                                                                       | Process algorithm                                                                                              |
| •                                                                                                                                                                                                                       | Stepwise processes for screening, medication review, sharing recommendations, patient education, and follow-up |
| 4.                                                                                                                                                                                                                      | Documentation requirements                                                                                     |
| 5.                                                                                                                                                                                                                      | Tools                                                                                                          |
| •                                                                                                                                                                                                                       | Cover fax form [Figure S1]                                                                                     |
| •                                                                                                                                                                                                                       | High-risk medication algorithms [Figure S2]                                                                    |
| •                                                                                                                                                                                                                       | High-risk medication index [Table S2]                                                                          |
| •                                                                                                                                                                                                                       | Medication review checklist [Figure S3]                                                                        |
| •                                                                                                                                                                                                                       | Prescriber communication form [20]                                                                             |
| •                                                                                                                                                                                                                       | Prescriber marketing flyer [Figure S4]                                                                         |
| •                                                                                                                                                                                                                       | Prescriber response form [20]                                                                                  |
| 6.                                                                                                                                                                                                                      | Resources                                                                                                      |
| •                                                                                                                                                                                                                       | STEADI: The Pharmacist's Role in Older Adult Fall Prevention Resources List [34]                               |
| •                                                                                                                                                                                                                       | Talking about Fall Prevention with Your Patients [35]                                                          |
| •                                                                                                                                                                                                                       | North Carolina Community-based fall prevention resources [Table S3]                                            |
| •                                                                                                                                                                                                                       | STEADI patient education resources [21–23]                                                                     |
| 7.                                                                                                                                                                                                                      | Acknowledgements                                                                                               |
| <b>LIVE WEBINAR</b>                                                                                                                                                                                                     |                                                                                                                |
| A one-hour live webinar held on three alternating (morning/evening) dates, two weeks prior to live implementation. The webinar was recorded and disseminated to pharmacies to ensure training fidelity of future staff. |                                                                                                                |
| Topics:                                                                                                                                                                                                                 |                                                                                                                |
| 1.                                                                                                                                                                                                                      | Purpose of project                                                                                             |
| 2.                                                                                                                                                                                                                      | Fall-prevention processes                                                                                      |
| 3.                                                                                                                                                                                                                      | Documentation and compensation processes                                                                       |
| 4.                                                                                                                                                                                                                      | Site visit expectations                                                                                        |
| <b>SITE VISIT</b>                                                                                                                                                                                                       |                                                                                                                |
| A 45- to 60-minute site visit conducted by a member of the research team to meet with the pharmacy project champion and participating staff. Occurred during the first week of live implementation.                     |                                                                                                                |
| Topics:                                                                                                                                                                                                                 |                                                                                                                |
| 1.                                                                                                                                                                                                                      | Staff introductions                                                                                            |
| 2.                                                                                                                                                                                                                      | Housekeeping                                                                                                   |

- 
- Obtain list of participating staff
  - Update contact information
  - Log training progress
  - 3. Brief orientation
  - 4. Practice case and review of toolkit resources
  - 5. Q&A
- 

#### **OPTIONAL TRAINING**

---

Two optional training opportunities:

- STEADI: The Pharmacist's Role in Older Adult Fall Prevention [24]
    - An online continuing pharmacy education module for pharmacists and technicians. Developed by the American Pharmacists Association (APhA) and the Centers for Disease Control and Prevention. Free registration for APhA members and non-members.
  - Collaborative Approach to Falls Assessment and Prevention [25]
    - A one-day workshop held at North Carolina Association of Pharmacists Annual Meeting in September 2017. Provided comprehensive training on fall-risk assessment and prevention by an interdisciplinary team of pharmacists, an occupational therapist, and physical therapist. Free registration for meeting attendees.
- 

#### **STEP 2: LONGITUDINAL TRAINING**

---

##### **QUICK TIPS WEBINARS**

---

Series of six 30-minute webinars held during the first six months of project. The webinars were recorded and disseminated to pharmacies to ensure training fidelity of future staff.

Topics

- Webinar 1: Review of screening and medication review processes
  - Webinar 2: Peer example – implementing screening and medication review
  - Webinar 3: How to talk about falls with your patients
  - Webinar 4: Sharing fall risk information with prescribers
  - Webinar 5: Peer example – collaborating with prescribers
  - Webinar 6: Peer example – Incorporating STEADI into other pharmacy services
- 

##### **QUICK TIPS EMAILS**

---

A biweekly-to-monthly email newsletter shared with pharmacy project champion and other pharmacy staff.

Topics:

- Best practices for:
    - Identifying and screening patients
    - Conducting medication reviews
    - Communicating with patients and prescribers
    - Documenting activities
    - Optimizing non-clinical staff
  - Frequently asked questions
  - Housekeeping
  - News about project, falls research, state and national initiatives
- 

#### **STEP 3: PROJECT COACHING**

---

A project coach was deployed from the investigative team to ensure fidelity of training among pharmacies and to provide technical support and feedback. The coach provided regular follow-up (i.e., every 1-2 weeks) by phone or email with pharmacy project champions for the first six months of the study. Follow-up continued to occur during the final three months of the project, but frequency was on an as-needed basis for each pharmacy.

---

Figure S1. Cover fax form.

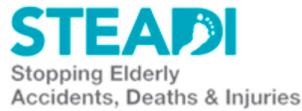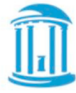

UNC  
ESHELMAN  
SCHOOL OF PHARMACY

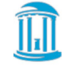

UNC  
SCHOOL OF MEDICINE  
Division of Geriatric Medicine  
Center for Aging & Health

Fax:

PRESCRIBER:

PHARMACIST:

FAX:

FAX:

PHONE:

PHONE:

SUBJECT: **FALLS-RISK ASSESSMENT**

DATE:

NO. PAGES:

COMMENTS: **CONTAINS SENSITIVE PATIENT INFORMATION**

## HELP US PREVENT FALLS IN YOUR OLDER ADULT PATIENTS

What does this mean for your practice?

- This is a pharmacy service supported by a grant from the Centers for Disease Control and Prevention to reduce the risk of falls in older adults through interprofessional collaboration.
- Through collaboration with your community pharmacy, you can meet your quality metrics (e.g. HEDIS measures, annual wellness visits)!
- You may receive a communication from a community pharmacy when they have identified an older adult at increased risk for falling.
- We request you review the pharmacist's recommendations and send your response back to the pharmacy.

How it works:

Patient identification  
at pharmacy

Pharmacist performs  
medication review

Care coordination  
with prescriber

**Figure S2: High-risk medication algorithms**

### Anticonvulsant Algorithm for Evaluating the Risk for Falls

The adverse effects associated with anticonvulsants may increase an individual's risk for falling. These agents cause sedation and dizziness resulting in the impairment of one's gait and balance and these effects are more pronounced in the elderly. Therefore, they should be used with caution in this population, especially when an individual is at increased risk for falls. In studies, anticonvulsants as a class have been found to increase the risk for falls and fracture. Even suggested alternatives may increase fall risk but are generally more tolerable and less likely to have altered pharmacokinetics in elderly patients compared to others in the class. Seizures may be controlled with lower or "subtherapeutic" doses of anticonvulsants in older patients.<sup>1-7</sup>

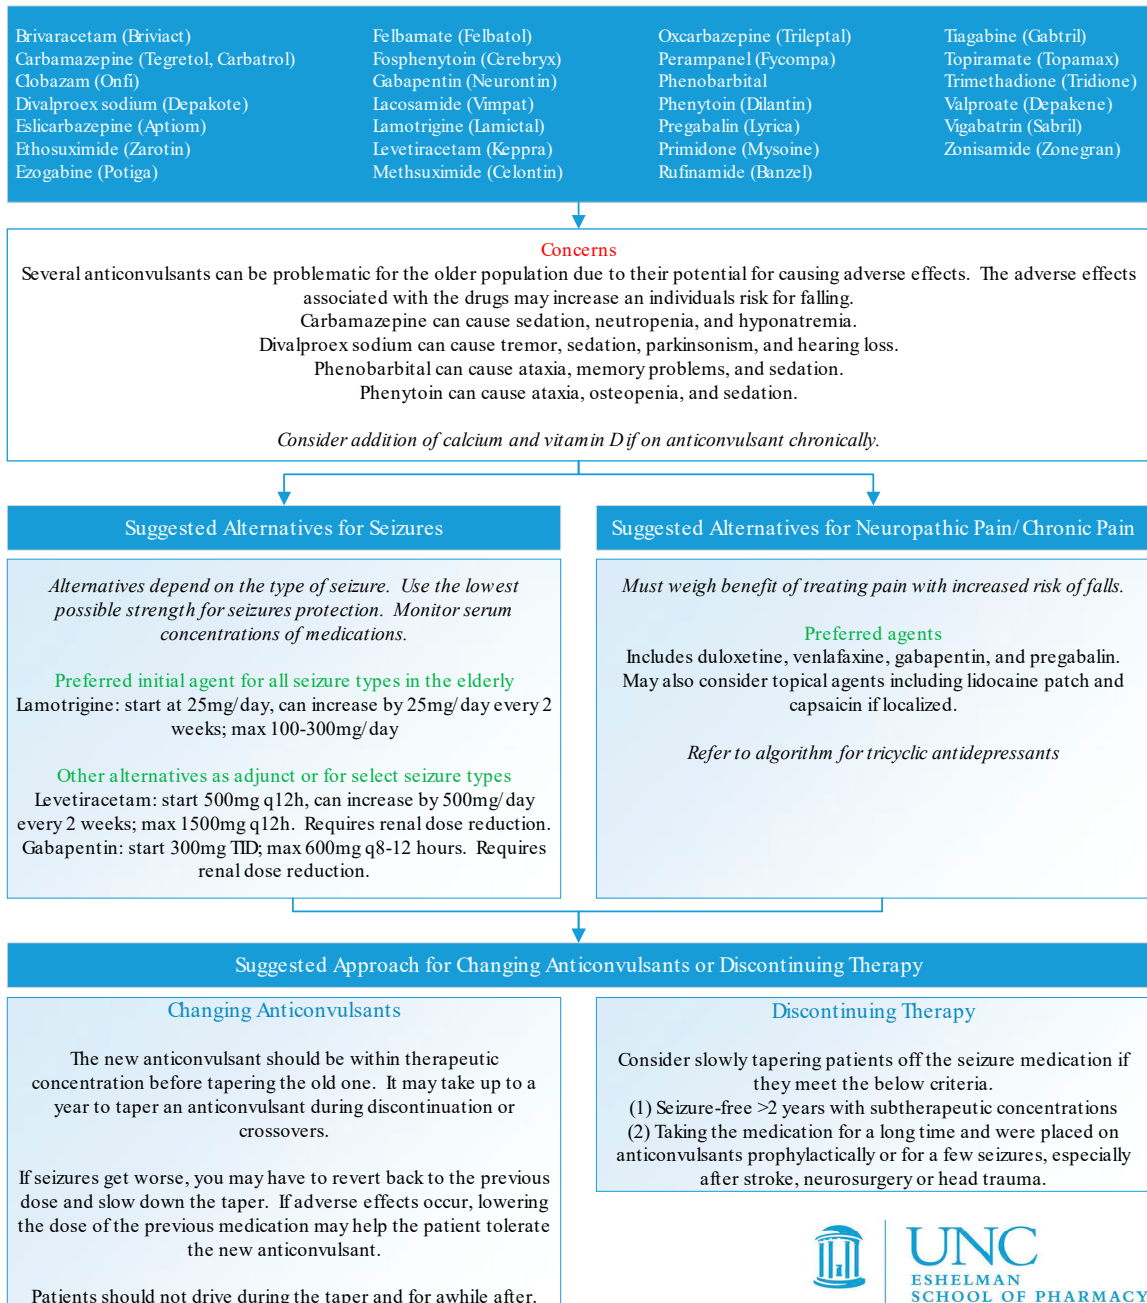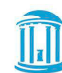

**UNC**  
ESHELMAN  
SCHOOL OF PHARMACY

## Antidepressant Algorithm for Evaluating Risk for Falls

It is unclear how antidepressants increase an individual's risk for falling. Possible mechanisms include their potential to cause sedation and postural disturbances, although these effects vary with each agent and each person. Additionally, antidepressants may be indirectly associated with fall risk attributed to factors such as poor health status, depression, and weight loss. In studies, antidepressants have been found to increase the risk for falls and fracture.<sup>8-10</sup>

|                                                                                                                                                                                              |                                                                                             |
|----------------------------------------------------------------------------------------------------------------------------------------------------------------------------------------------|---------------------------------------------------------------------------------------------|
| <b>Selective Serotonin Reuptake Inhibitors</b><br>Citalopram (Celexa)<br>Escitalopram (Lexapro)<br>Fluoxetine (Prozac)<br>Mirtazapine (Remeron)<br>Paroxetine (Paxil)<br>Sertraline (Zoloft) | <b>5-HT<sub>2</sub> Receptor Antagonists</b><br>Nefazodone (Serzone)<br>Trazodone (Desyrel) |
| <b>Serotonin Norepinephrine Reuptake Inhibitors</b><br>Desvenlafaxine (Pristiq)<br>Duloxetine (Cymbalta)<br>Levomilnacipran (Fetzima)<br>Venlafaxine (Effexor, Effexor XR)                   | <b>Noradrenergic Agonist</b><br>Fluvoxamine (Luvox)<br>Vilazodone (Viibryd)                 |
| <b>Anxiolytics</b><br>Buspirone (Buspar)                                                                                                                                                     | <b>Dopamine Reuptake Blocking Agents</b><br>Bupropion (Wellbutrin, Wellbutrin SR)           |
| <b>Tricyclic Antidepressants Refer to TCA Algorithm</b>                                                                                                                                      |                                                                                             |
| <b>Monoamine Oxidase Inhibitors</b><br>Isocarboxazid (Marplan)<br>Phenelzine (Nardil)<br>Tranylcypromine (Parnate)                                                                           |                                                                                             |

### General Considerations

#### AVOID

**Paroxetine** due to greater anticholinergic properties than other antidepressants, which may increase one's risk for falling. Anticholinergic adverse effects include sedation, confusion, dizziness, gait and balance problems, and weakness.

#### AVOID

**Fluoxetine** due to long-half life, which may be even more pronounced in the elderly; thereby increasing the risk for excessive CNS stimulation, sleep disturbances, and increasing agitation.

#### AVOID

**Fluvoxamine** due to drug interactions and availability of effective and safer agents.

#### AVOID

**Nefazodone**, while not directly linked to falls, is associated with hepatotoxicity and significant drug interactions, which limit its use. Alternatives exist that are safer and as effective for treating depression.

#### AVOID

**Isocarboxazid, Phenelzine, and Tranylcypromine** should be avoided in the elderly due to their potential for toxicity and risk of drug-drug and drug-food interactions.

*Must weigh benefit of treating depression with increased risk for falls associated with antidepressants. Selection of an antidepressant should be individualized, taking into account patient factors and concomitant medical conditions and medications.*

### Suggested Alternatives

**Citalopram:** start 10mg daily; max 20mg/day

**Escitalopram:** start 5mg daily; max 10mg/day

**Sertraline:** start 25mg daily; max 200mg/day

**Duloxetine:** avoid if GFR <30mL/min; start 30mg daily x2 weeks, increase to 60mg daily; max 120mg/day

**Venlafaxine:** start 37.5mg (XR) or 25mg once or twice daily (IR); max 225mg/day

**Bupropion:** start 37.5mg BID (IR), 100mg daily (SR), 150mg daily (XR); max 450mg/day (IR, XR), 400mg/day (SR)

**Buspirone:** as adjunct start 7.5mg daily; max 7.5mg BID

Educate patient on the potential for increased sedation, dizziness, and postural changes from the antidepressant.

Monitor closely for adverse effects and falls. Consider switching agent if adverse effects are apparent.

There is no one antidepressant or class considered the agent or class of choice in reducing one's risk for falls.

The association with antidepressants and fall risk has been attributed to all antidepressant agents.

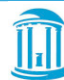

**UNC**  
**ESHELMAN**  
**SCHOOL OF PHARMACY**

## Antihypertensive Algorithms for Evaluating the Risk for Falls

There is mixed evidence regarding association of antihypertensives and fall risk. Hypotension and orthostatic hypotension may contribute to fall risk, but evidence is also inconsistent in this aspect. There is no strong evidence indicating a specific class is preferred over others due to lower fall risk. However, with the possibility of orthostatic hypotension contributing to falls and strong evidence of cardiovascular benefits with specific classes of antihypertensives, some may be preferred over others.<sup>11-20</sup>

|                              |                              |                     |               |
|------------------------------|------------------------------|---------------------|---------------|
| Peripheral alpha-1 blockers  | Calcium channel blockers     | Diuretics           | Beta-blockers |
| Doxazosin                    | Amlodipine                   | Amiloride           | Acebutaolol   |
| Prazosin                     | Diltiazem                    | Bumetanide          | Atenolol      |
| Terazosin                    | Felodipine                   | Chlorthalidone      | Bisoprolol    |
|                              | Isradipine                   | Chlorthiazide       | Carvedilol    |
|                              | Nicardipine                  | Eplerenone          | Labetalol     |
| Centrally-acting Medications | Nifedipine                   | Furosemide          | Metoprolol    |
| Clonidine                    | Nimodipine                   | Hydrochlorothiazide | Nadolol       |
| Guanabenz                    | Nisoldipine                  | Indapamide          | Nebivolol     |
| Guanfacine                   | Verapamil                    | Metolazone          | Penbutolol    |
| Methyldopa                   |                              | Spirolactone        | Pindolol      |
| Reserpine                    | Direct arterial vasodilators | Triamterene         | Propranolol   |
|                              | Hydralazine                  | Torsemide           | Timolol       |
|                              | Minoxidil                    |                     |               |

### General Considerations

#### AVOID

Peripheral alpha-1 blockers for treatment of hypertension due to high risk of orthostatic hypotension and availability of alternative agents with superior risk-benefit profile.

#### AVOID

Centrally-acting medications due to high risk of adverse CNS effects, bradycardia, and orthostatic hypotension.

#### AVOID

Immediate release nifedipine due to potential for hypotension

### Suggested Alternatives

There is no clear evidence indicating that one medication or medication class should be preferred over others to reduce fall risk.

Selection of agents depends on patient's comorbid conditions. Generally, angiotensin-converting enzyme inhibitors, angiotensin II receptor blockers, calcium channel blockers, or thiazide diuretics would be preferred first-line agents for hypertension based on current guidelines.

Consider beta-blocker if patient has another compelling indication for its use or has resistant hypertension on preferred first-line agents. Selective beta-blockers (acebutaolol, atenolol, betaxolol, bisoprolol, metoprolol, nebivolol) may have lower fall risk than non-selective beta blockers.

## Antipsychotic Algorithm for Evaluating the Risk for Falls

Antipsychotics are thought to increase one's risk for falls due to their potential to cause significant adverse effects, including reduced alertness, impaired neuromuscular functioning, sedation, dizziness, postural hypotension, altered gait and balance, and extrapyramidal symptoms. In studies, antipsychotics have been found to increase one's risk for falls. Although atypical antipsychotics are generally better-tolerated overall and have less extrapyramidal effects, they are also associated with increased risk of falls. Avoid use of antipsychotics for treatment of conditions other than psychiatric conditions.<sup>21-28</sup>

| Typical Antipsychotics            |                               | Atypical Antipsychotics    |                                 |
|-----------------------------------|-------------------------------|----------------------------|---------------------------------|
| Chlorpromazine (Thorazine)        | Pimozide (Orap)               | Aripiprazole (Abilify)     | Olanzapine/Fluoxetine (Symbyax) |
| Fluphenazine (Permitil, Prolixin) | Thioridazine (Mellaril)       | Asenapine Maleate (Sapris) | Paliperidone (Invega)           |
| Haloperidol (Haldol)              | Thiothixene (Navane)          | Clozapine (Clozaril)       | Quetiapine (Seroquel)           |
| Loxapine (Loxitane, Loxitane C)   | Trifluoroperazine (Stelazine) | Iloperidone (Fanapt)       | Risperidone (Risperdal)         |
| Molindone (Moban)                 |                               | Lurasidone (Latuda)        | Ziprasidone (Geodon)            |
| Perphenazine (Trilafon)           |                               | Olanzapine (Zyprexa)       |                                 |

### General Considerations

#### AVOID

Thioridazine due to potential for increased CNS and extrapyramidal adverse effects. This drug has a high incidence of sedation, orthostatic hypotension, and anticholinergic adverse effects, which may increase one's risk for falls.

#### AVOID

Chlorpromazine due to a high incidence of sedation, orthostatic hypotension, and anticholinergic adverse effects, which may increase one's risk for falls.

#### AVOID

Antipsychotics in elderly individuals with dementia which has been associated with increased mortality. If required use lowest dose for shortest duration needed.

### Insomnia

If low-dose antipsychotic being used, can discontinue without tapering.

#### Suggested Alternatives

The following agents should only be used when all possible reasons for insomnia have been ruled out and behavioral approaches to sleep management (i.e., sleep hygiene) have been addressed. The lowest dose possible for a short-term period is recommended.

Preferred drugs include: melatonin, ramelteon, trazodone, mirtazapine

*Refer to algorithm for sedative hypnotics.*

### Behavioral Complications in Dementia

When discontinuing, consider tapering by 25% of original dose every 1-2 weeks.

Non-pharmacological interventions should be utilized before starting antipsychotic.

Risks and benefits of used should be carefully assessed.

If non-pharmacological approaches have failed and symptoms are severe, dangerous, and/or cause significant distress to patient, low dose, less anticholinergic agent may be acceptable for shortest duration possible. Consider trial discontinuation within 4 months.

#### Suggested Alternatives

Preferred drugs include:

Aripiprazole: start 2-5mg/day, can increase every 2 weeks if needed; max 30mg/day  
Olanzapine: start 2.5mg/day; max 10mg/day

Quetiapine: start 12.5-25mg/day; max 200mg/day in 1-2 doses

Risperidone: start 0.25mg/day; max 6mg/day in 1-2 doses

### Other Indications

Rule out any other causes of symptoms prior to initiating drug therapy.

For psychiatric conditions such as schizophrenia, schizoaffective disorder, bipolar disorder atypical antipsychotics with less anticholinergic properties may be preferred.

#### Suggested Alternatives

Preferred drugs include: aripiprazole, olanzapine, quetiapine, and risperidone

For management of acute psychiatric conditions such as delirium, address any contributing factors and utilize non-pharmacological interventions prior to medications. The previously noted medications may be used.

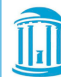

**UNC**  
ESHELMAN  
SCHOOL OF PHARMACY

## Antispasmodic Algorithm for Evaluating the Risk for Falls

Antispasmodics have not been studied in association with increasing fall risk; however, the adverse effects associated with the drugs may increase an individual's risk for falling. These agents are highly anticholinergic and cause sedation, confusion, dizziness, gait and balance problems, and weakness. These effects are more pronounced in the elderly. Therefore, they should be used with caution in this population, especially when an individual is at an increased risk for falls.<sup>29-35</sup>

| Skeletal Muscle Relaxants                                                                                                                                                                                                            | Gastrointestinal Antispasmodics                                                                                                                                          | Urinary Antispasmodics                                                                                                                                                  |
|--------------------------------------------------------------------------------------------------------------------------------------------------------------------------------------------------------------------------------------|--------------------------------------------------------------------------------------------------------------------------------------------------------------------------|-------------------------------------------------------------------------------------------------------------------------------------------------------------------------|
| Baclofen (Lioresal)<br>Carisoprodol (Soma)<br>Chlorzoxazone (Paraflex)<br>Cyclobenzaprine (Flexeril)<br>Dantrolene (Dantrium)<br>Metaxalone (Skelaxin)<br>Methocarbamol (Robaxin)<br>Orphenadrine (Norflex)<br>Tizanidine (Zanaflex) | Belladonna Alkaloids (Donnatol, others)<br>Clidinium-Chlordiazepoxide (Librax)<br>Dicyclomine (Bentyl)<br>Hyoscyamine (Levsin, Levsinex)<br>Propantheline (Pro-Banthine) | Darifenacin (Enablex)<br>Fesoterodine (Toviaz)<br>Flavoxate (Urispas)<br>Oxybutynin (Ditropan)<br>Solifenacin (Vesicare)<br>Tolterodine (Detrol)<br>Trospium (Sanctura) |

### General Considerations

#### AVOID MOST AGENTS

The benefit of using one of these agents in an elderly individual, especially an individual already at an increased risk for falling, will likely not outweigh the risks and adverse effects associated with these agents.

These agents are not recommended to be used in the elderly due to their potential for causing significant adverse effects. While these agents have not been studied in association with increasing fall risk, the adverse effects associated with the drugs may increase an individual's risk for falling. They are highly anticholinergic and cause sedation, confusion, dizziness, gait and balance problems, and weakness. Additionally, their effectiveness at doses tolerated by the elderly is questionable.

### Spasms or Pain Associated with Muscle Spasms

Consider nonpharmacologic approaches, such as exercise and/or physical therapy, if appropriate.

If patient has true spasticity and the decision is made to use one of these agents in an elderly individual at an increased risk for falls, the following may be considered:

#### Suggested Alternatives

**Baclofen:** start 5mg 2-3x/day; max 80mg/day

Use the lowest dose possible for shortest duration.  
Limit use to 2-3 weeks.

Document need for medication in light of fall risk.

### Spasms Associated with Neurogenic Bladder or Urinary Incontinence

Nonpharmacologic treatment should be first-line prior to trying medication. All agents have similar efficacy.

Some newer agents and topical agents have less CNS effects and may be preferred over other agents. The following may be considered:

#### Suggested Alternatives

**Darifenacin:** 7.5mg daily, can increase to 15mg after at least 2 weeks

**Fesoterodine:** 4mg daily; max 8mg/day

**Trospium:** 20mg BID (IR) or 60mg daily (XR)

**Oxybutynin Transdermal Patch:** apply one 3.9mg patch q3-4 days

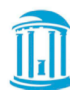

**UNC**  
ESHELMAN  
SCHOOL OF PHARMACY

## Benzodiazepine Algorithm for Evaluating the Risk for Falls

The adverse effects associated with benzodiazepines may increase an individual's risk for falling. These agents are highly anticholinergic and cause sedation, confusion, dizziness, gait and balance problems, and weakness. These effects are more pronounced in the elderly. Therefore, they should be used with caution in this population, especially when an individual is at increased risk for falls. In studies, benzodiazepines as a class have been found to increase the risk for falls and fracture.<sup>36-39</sup>

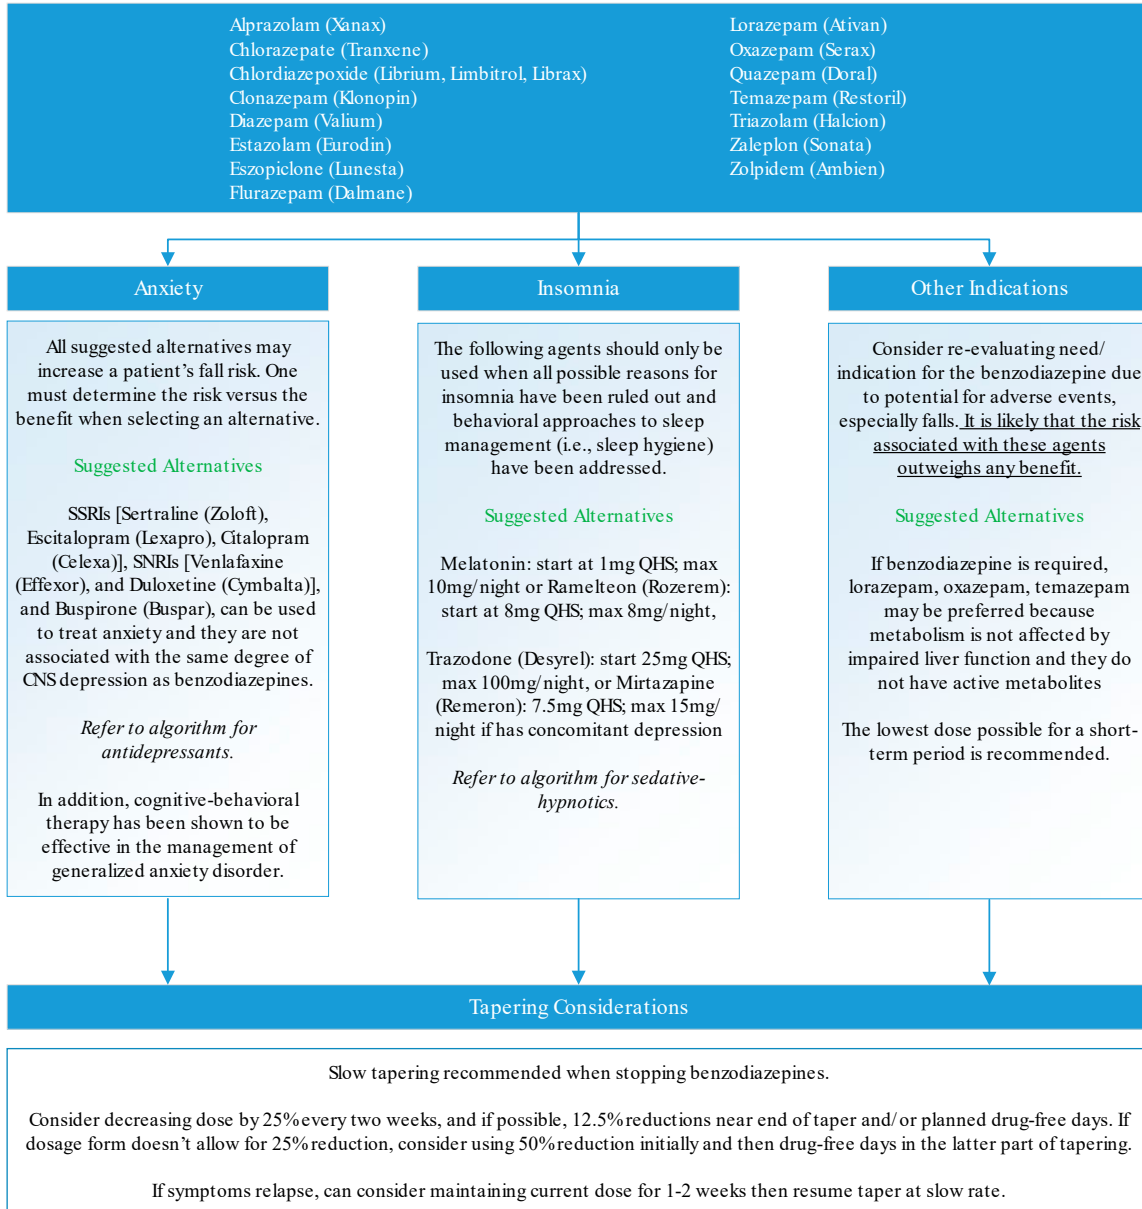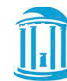

**UNC**  
ESHELMAN  
SCHOOL OF PHARMACY

## Opioid Algorithm for Evaluating the Risk for Falls

The opioids likely increase an individual's risk for falling due to their potential for causing adverse effects, including reduced alertness, impaired neuromuscular function, sedation, dizziness, impaired cognition, and unsteadiness or impaired functioning. In studies, opioids/narcotics have been found to increase one's risk for falls and fracture, although findings are inconsistent.<sup>45-49</sup>

Buprenorphine (Butrans)  
Codeine (Tylenol with Codeine)  
Fentanyl (Duragesic)  
Hydrocodone (Norco, Vicodin, Lorcet)  
Hydromorphone (Dilaudid)  
Levorphanol  
Meperidine (Demerol)

Methadone (Methadose)  
Morphine (MS Contin)  
Oxycodone (Oxycontin, Roxicodone)  
Oxymorphone (Opana; Opana ER)  
Pentazocine/naloxone  
Tapentadol (Nucynta, Nucynta ER)

Note: The above agents are found in various combination products

### General Considerations

#### AVOID

Pentazocine/naloxone as it causes CNS adverse effects, including confusion and hallucinations, which may increase one's risk for falls.

#### AVOID

Meperidine as it is not an effective oral analgesic in dosages commonly used and may have a higher risk of neurotoxicity, which may increase one's risk for falls.

### Nociceptive Pain

*Must weigh benefit of treating pain and increased risk of adverse effects and falls associated with opioids. If the opioid is continued, educate patient on the potential for increased sedation, dizziness, unsteadiness, and confusion, and closely monitor for the presence of these adverse effects.*

Consider the following:

Limit dose to 1 tablet at a time rather than 1-2 tablets.  
Switch drug if adverse effects are apparent.

#### Suggested Alternatives

##### Localized Pain:

Topical Capsaicin: usually applied 2-4 times daily  
Diclofenac gel (Voltaren): 2-4g up to 4 times daily; max 32g/day

##### Mild-Moderate pain:

Acetaminophen (Tylenol): dose q6-8hrs; max 3g/day  
Salsalate (Salflex): 500mg q8-12h; max 3g/day  
NSAIDs (ibuprofen, naproxen, diclofenac, celecoxib) use with caution if no HF and eGFR >30mL/min and given with PPI for gastroprotection. Note: avoid indomethacin due to CNS adverse effects; avoid ketorolac due to increased risk of bleeding, renal failure, high blood pressure, and heart failure.

##### Moderate-Severe pain:

Tramadol (Ultram): avoid if CrCl <30mL/min, start 25mg (IR) QHS; max 300mg/day (divided QID)  
Oxycodone: 2.5mg QHS; max 2.5-5mg q4-6h  
Morphine sulfate: 7.5mg QHS; max 15mg q12h  
Increase slowly and use the lowest dose possible to control pain.

### Neuropathic Pain

*All suggested oral alternatives may increase a patient's fall risk. One must determine the risk versus the benefit when selecting an alternative.*

#### Suggested Alternatives

##### Topical Agents:

Capsaicin: usually applied 2-4 times daily  
Lidocaine patch (Lidoderm): apply to affected area for 12 hours, then remove for 12 hours

##### Oral Agents:

Duloxetine (Cymbalta): avoid if GFR <30mL/min, start 30mg daily; max 60mg/day

Venlafaxine (Effexor): start 37.5mg daily; max 225mg/day

Gabapentin (Neurontin): must be renally adjusted, start 100mg QHS, then 100mg q8h; max 3600mg/day

Pregabalin (Lyrica): must be renally adjusted, start 50mg QHS, then 50mg q8h; max 300mg/day

*Refer to algorithm for TCAs*

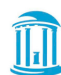

UNC  
ESHELMAN  
SCHOOL OF PHARMACY

## Sedative Hypnotic Algorithm for Evaluating the Risk for Falls

The adverse effects associated with sedative hypnotics may increase an individual's risk for falling. These agents are highly anticholinergic and cause sedation, confusion, dizziness, gait and balance problems, and weakness. These effects are more pronounced in the elderly. Therefore, they should be used with caution in this population, especially when an individual is at increased risk for falls. In studies, sedative hypnotics as a class have been found to increase the risk for falls and fracture.<sup>50-54</sup>

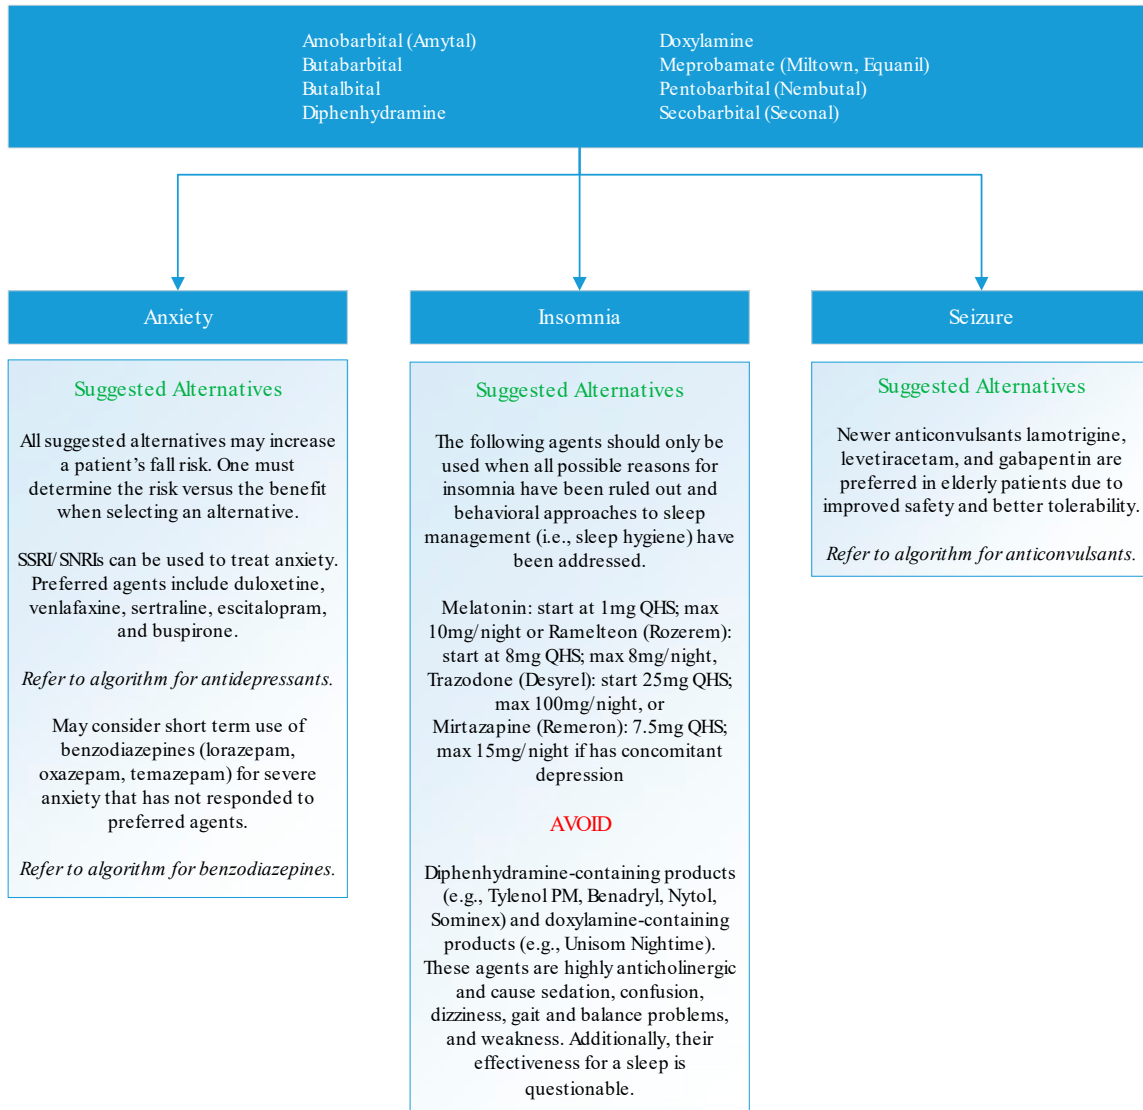

## Tricyclic Antidepressant Algorithm for Evaluating the Risk for Falls

The tricyclic antidepressants are associated with high incidence of anticholinergic adverse effects, including reduced alertness, impaired neuromuscular functioning, sedation, dizziness, postural hypotension, altered gait and balance, and confusion. In studies, the tricyclic antidepressants have been associated with increased risk of falls.<sup>55-59</sup>

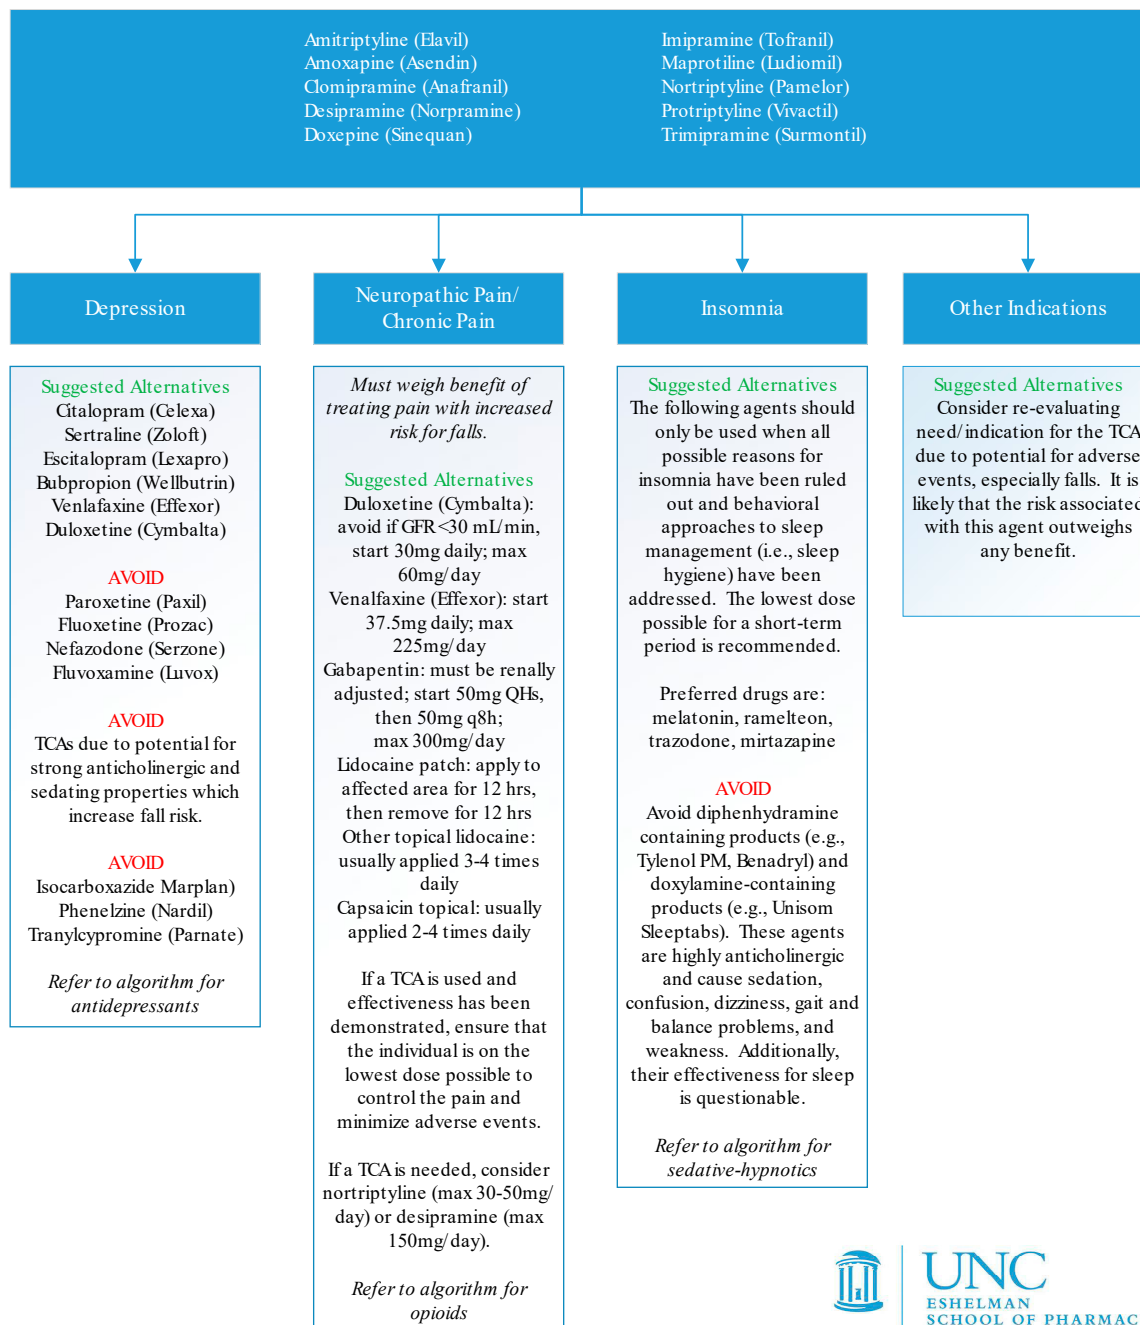

### High-risk medication algorithm references

1. American Geriatrics Society 2015 Beers Criteria Update Expert Panel. American Geriatrics Society 2015 Updated Beers Criteria for Potentially Inappropriate Medication Use in Older Adults. Journal of the American Geriatrics Society. 2015;63(11):2227-2246.
2. Woolcott JC, Richardson KJ, Wiens MO, et al. Meta-analysis of the impact of 9 medication classes on falls in elderly persons. Arch Intern Med. 2009;169(21):1952-1960.

3. Maximos M, Chang F, Patel T. Risk of falls associated with antiepileptic drug use in ambulatory elderly populations: A systematic review. *Canadian pharmacists journal* : CPJ = Revue des pharmaciens du Canada : RPC. 2017;150(2):101-111.
4. Boyle N, Naganathan V, Cumming RG. Medication and falls: risk and optimization. *Clinics in geriatric medicine*. 2010;26(4):583-605.
5. Hanlon JT, Semla TP, Schmader KE. Alternative Medications for Medications in the Use of High-Risk Medications in the Elderly and Potentially Harmful Drug–Disease Interactions in the Elderly Quality Measures. *Journal of the American Geriatrics Society*. 2015;63(12):e8-e18.
6. Schmidt D, Schachter SC. Drug treatment of epilepsy in adults. *Bmj*. 2014;348:g254.
7. Pohlmann-Eden B, Marson AG, Noack-Rink M, et al. Comparative effectiveness of levetiracetam, valproate and carbamazepine among elderly patients with newly diagnosed epilepsy: subgroup analysis of the randomized, unblinded KOMET study. *BMC neurology*. 2016;16(1):149.
8. American Geriatrics Society 2015 Beers Criteria Update Expert Panel. American Geriatrics Society 2015 Updated Beers Criteria for Potentially Inappropriate Medication Use in Older Adults. *Journal of the American Geriatrics Society*. 2015;63(11):2227-2246.
9. Hanlon JT, Semla TP, Schmader KE. Alternative Medications for Medications in the Use of High-Risk Medications in the Elderly and Potentially Harmful Drug–Disease Interactions in the Elderly Quality Measures. *Journal of the American Geriatrics Society*. 2015;63(12):e8-e18.
10. The Management of MDD Working Group. VA/DoD Clinical Practice Guideline for the Management of Major Depressive Disorder. Washington, DC: U.S. Department of Veterans Affairs and Department of Defense, 2016.
11. American Geriatrics Society 2015 Beers Criteria Update Expert Panel. American Geriatrics Society 2015 Updated Beers Criteria for Potentially Inappropriate Medication Use in Older Adults. *Journal of the American Geriatrics Society*. 2015;63(11):2227-2246.
12. Woolcott JC, Richardson KJ, Wiens MO, et al. Meta-analysis of the impact of 9 medication classes on falls in elderly persons. *Arch Intern Med*. 2009;169(21):1952-1960.
13. Zang G. Antihypertensive drugs and the risk of fall injuries: a systematic review and meta-analysis. *The Journal of international medical research*. 2013;41(5):1408-1417.
14. Lipsitz LA, Habtemariam D, Gagnon M, et al. Reexamining the Effect of Antihypertensive Medications on Falls in Old Age. *Hypertension (Dallas, Tex : 1979)*. 2015;66(1):183-189.
15. Hartog LC, Cimzar-Sweelssen M, Knipscheer A, et al. Orthostatic hypotension does not predict recurrent falling in a nursing home population. *Archives of gerontology and geriatrics*. 2017;68:39-43.
16. Marcum ZA, Perera S, Newman AB, et al. Antihypertensive Use and Recurrent Falls in Community-Dwelling Older Adults: Findings From the Health ABC Study. *The journals of gerontology Series A, Biological sciences and medical sciences*. 2015;70(12):1562-1568.
17. Margolis KL, Palermo L, Vittinghoff E, et al. Intensive blood pressure control, falls, and fractures in patients with type 2 diabetes: the ACCORD trial. *Journal of general internal medicine*. 2014;29(12):1599-1606.
18. Tinetti ME, Han L, Lee DS, et al. Antihypertensive medications and serious fall injuries in a nationally representative sample of older adults. *JAMA internal medicine*. 2014;174(4):588-595.
19. Ham AC, van Dijk SC, Swart KMA, et al. Beta-blocker use and fall risk in older individuals: Original results from two studies with meta-analysis. *British journal of clinical pharmacology*. 2017.
20. Parekh N, Page A, Ali K, Davies K, Rajkumar C. A practical approach to the pharmacological management of hypertension in older people. *Therapeutic advances in drug safety*. 2017;8(4):117-132.
21. American Geriatrics Society 2015 Beers Criteria Update Expert Panel. American Geriatrics Society 2015 Updated Beers Criteria for Potentially Inappropriate Medication Use in Older Adults. *Journal of the American Geriatrics Society*. 2015;63(11):2227-2246.
22. Hien le TT, Cumming RG, Cameron ID, et al. Atypical antipsychotic medications and risk of falls in residents of aged care facilities. *Journal of the American Geriatrics Society*. 2005;53(8):1290-1295.
23. Huang AR, Mallet L, Rochefort CM, Egualé T, Buckeridge DL, Tamblyn R. Medication-related falls in the elderly: causative factors and preventive strategies. *Drugs Aging*. 2012;29(5):359-376.
24. Boyle N, Naganathan V, Cumming RG. Medication and falls: risk and optimization. *Clinics in geriatric medicine*. 2010;26(4):583-605.
25. Bjerre LM, Farrell B, Hogel M, et al. Deprescribing antipsychotics for behavioural and psychological symptoms of dementia (BPSD) and insomnia: an evidence-based clinical practice guideline. 2016.
26. Suzuki T, Remington G, Uchida H, Rajji TK, Graff-Guerrero A, Mamo DC. Management of schizophrenia in late life with antipsychotic medications: a qualitative review. *Drugs Aging*. 2011;28(12):961-980.
27. Wang LY, Borisovskaya A, Maxwell AL, Pascualy M. Common psychiatric problems in cognitively impaired older patients: causes and management. *Clinics in geriatric medicine*. 2014;30(3):443-467.
28. Reus VI, Fochtmann LJ, Eyler AE, et al. The American Psychiatric Association Practice Guideline on the Use of Antipsychotics to Treat Agitation or Psychosis in Patients With Dementia. *American Journal of Psychiatry*. 2016;173(5):543-546.
29. American Geriatrics Society 2015 Beers Criteria Update Expert Panel. American Geriatrics Society 2015 Updated Beers Criteria for Potentially Inappropriate Medication Use in Older Adults. *Journal of the American Geriatrics Society*. 2015;63(11):2227-2246.

30. Derner MM, Linhart CA, Pederson LM, et al. Injuries in Adults 65 Years of Age and Older Prescribed Muscle Relaxants. *The Consultant pharmacist : the journal of the American Society of Consultant Pharmacists*. 2016;31(9):511-517.
31. Spence MM, Karim FA, Lee EA, Hui RL, Gibbs NE. Risk of Injury in Older Adults Using Gastrointestinal Antispasmodic and Anticholinergic Medications. *Journal of the American Geriatrics Society*. 2015;63(6):1197-1202.
32. Spence MM, Shin PJ, Lee EA, Gibbs NE. Risk of injury associated with skeletal muscle relaxant use in older adults. *The Annals of pharmacotherapy*. 2013;47(7-8):993-998.
33. Marcum ZA, Duncan NA, Makris UE. Pharmacotherapies in Geriatric Chronic Pain Management. *Clinics in geriatric medicine*. 2016;32(4):705-724.
34. Chancellor M, Boone T. Anticholinergics for overactive bladder therapy: central nervous system effects. *CNS neuroscience & therapeutics*. 2012;18(2):167-174.
35. Chancellor MB, Staskin DR, Kay GG, Sandage BW, Oefelein MG, Tsao JW. Blood-brain barrier permeation and efflux exclusion of anticholinergics used in the treatment of overactive bladder. *Drugs Aging*. 2012;29(4):259-273.
36. Schroeck JL, Ford J, Conway EL, et al. Review of Safety and Efficacy of Sleep Medicines in Older Adults. *Clinical therapeutics*. 2016;38(11):2340-2372.
37. American Geriatrics Society 2015 Beers Criteria Update Expert Panel. American Geriatrics Society 2015 Updated Beers Criteria for Potentially Inappropriate Medication Use in Older Adults. *Journal of the American Geriatrics Society*. 2015;63(11):2227-2246.
38. Hanlon JT, Semla TP, Schmader KE. Alternative Medications for Medications in the Use of High-Risk Medications in the Elderly and Potentially Harmful Drug–Disease Interactions in the Elderly Quality Measures. *Journal of the American Geriatrics Society*. 2015;63(12):e8-e18.
39. Pottie K, Thompson W, Davies S, et al. Evidence-based clinical practice guideline for deprescribing benzodiazepine receptor agonists. Unpublished manuscript. 2016.
40. Nelson JM, Dufraux K, Cook PF. The relationship between glycemic control and falls in older adults. *Journal of the American Geriatrics Society*. 2007;55(12):2041-2044.
41. Johnston SS, Conner C, Aagren M, Ruiz K, Bouchard J. Association between hypoglycaemic events and fall-related fractures in Medicare-covered patients with type 2 diabetes. *Diabetes, obesity & metabolism*. 2012;14(7):634-643.
42. Signorovitch JE, Macaulay D, Diener M, et al. Hypoglycaemia and accident risk in people with type 2 diabetes mellitus treated with non-insulin antidiabetes drugs. *Diabetes, obesity & metabolism*. 2013;15(4):335-341.
43. American Geriatrics Society 2015 Beers Criteria Update Expert Panel. American Geriatrics Society 2015 Updated Beers Criteria for Potentially Inappropriate Medication Use in Older Adults. *Journal of the American Geriatrics Society*. 2015;63(11):2227-2246.
44. Hanlon JT, Semla TP, Schmader KE. Alternative Medications for Medications in the Use of High-Risk Medications in the Elderly and Potentially Harmful Drug–Disease Interactions in the Elderly Quality Measures. *Journal of the American Geriatrics Society*. 2015;63(12):e8-e18.
45. American Geriatrics Society 2015 Beers Criteria Update Expert Panel. American Geriatrics Society 2015 Updated Beers Criteria for Potentially Inappropriate Medication Use in Older Adults. *Journal of the American Geriatrics Society*. 2015;63(11):2227-2246.
46. Hanlon JT, Semla TP, Schmader KE. Alternative Medications for Medications in the Use of High-Risk Medications in the Elderly and Potentially Harmful Drug–Disease Interactions in the Elderly Quality Measures. *Journal of the American Geriatrics Society*. 2015;63(12):e8-e18.
47. Abdulla A, Adams N, Bone M, et al. Guidance on the management of pain in older people. *Age and ageing*. 2013;42(suppl\_1):i1-i57.
48. Makris UE, Abrams RC, Gurland B, Reid MC. Management of persistent pain in the older patient: a clinical review. *JAMA : the journal of the American Medical Association*. 2014;312(8):825-836.
49. Fine PG. Treatment Guidelines for the Pharmacological Management of Pain in Older Persons. *Pain Medicine*. 2012;13(suppl\_2):S57-S66.
50. American Geriatrics Society 2015 Beers Criteria Update Expert Panel. American Geriatrics Society 2015 Updated Beers Criteria for Potentially Inappropriate Medication Use in Older Adults. *Journal of the American Geriatrics Society*. 2015;63(11):2227-2246.
51. Hanlon JT, Semla TP, Schmader KE. Alternative Medications for Medications in the Use of High-Risk Medications in the Elderly and Potentially Harmful Drug–Disease Interactions in the Elderly Quality Measures. *Journal of the American Geriatrics Society*. 2015;63(12):e8-e18.
52. Abdulla A, Adams N, Bone M, et al. Guidance on the management of pain in older people. *Age and ageing*. 2013;42(suppl\_1):i1-i57.
53. Makris UE, Abrams RC, Gurland B, Reid MC. Management of persistent pain in the older patient: a clinical review. *JAMA : the journal of the American Medical Association*. 2014;312(8):825-836.
54. Fine PG. Treatment Guidelines for the Pharmacological Management of Pain in Older Persons. *Pain Medicine*. 2012;13(suppl\_2):S57-S66.
55. American Geriatrics Society 2015 Beers Criteria Update Expert Panel. American Geriatrics Society 2015 Updated Beers Criteria for Potentially Inappropriate Medication Use in Older Adults. *Journal of the American Geriatrics Society*. 2015;63(11):2227-2246.

56. Boyle N, Naganathan V, Cumming RG. Medication and falls: risk and optimization. Clinics in geriatric medicine. 2010;26(4):583-605.
57. Hanlon JT, Semla TP, Schmader KE. Alternative Medications for Medications in the Use of High-Risk Medications in the Elderly and Potentially Harmful Drug–Disease Interactions in the Elderly Quality Measures. Journal of the American Geriatrics Society. 2015;63(12):e8-e18.
58. Schroeck JL, Ford J, Conway EL, et al. Review of Safety and Efficacy of Sleep Medicines in Older Adults. Clinical therapeutics. 2016;38(11):2340-2372.
59. Makris UE, Abrams RC, Gurland B, Reid MC. Management of persistent pain in the older patient: a clinical review. JAMA : the journal of the American Medical Association. 2014;312(8):825-836.

**Table S2.** High-risk medication index.

| Medication           | Algorithm                 |
|----------------------|---------------------------|
| <b>A</b>             |                           |
| Abilify              | Antipsychotics            |
| acebutalol           | Antihypertensives         |
| Actiq                | Opioids                   |
| Aldactazide          | Antihypertensives         |
| Aldactone            | Antihypertensives         |
| Aldomet              | Antihypertensives         |
| alprazolam           | Benzodiazepines           |
| Ambien               | Benzodiazepines           |
| amiloride            | Antihypertensives         |
| amitriptyline        | Tricyclic Antidepressants |
| amlodipine           | Antihypertensives         |
| amobarbital          | Sedative Hypnotics        |
| amoxapine            | Tricyclic Antidepressants |
| Amytal               | Sedative Hypnotics        |
| Anafranil            | Tricyclic Antidepressants |
| Apresoline           | Antihypertensives         |
| Aptiom               | Anticonvulsants           |
| aripiprazole         | Antipsychotics            |
| asenapine maleate    | Antipsychotics            |
| Asendin              | Tricyclic Antidepressants |
| Atacand HCT          | Antihypertensives         |
| atenolol             | Antihypertensives         |
| Ativan               | Benzodiazepines           |
| Avalide              | Antihypertensives         |
| Azor                 | Antihypertensives         |
| <b>B</b>             |                           |
| baclofen             | Antispasmodics            |
| Banzel               | Anticonvulsants           |
| belladonna alkaloids | Antispasmodics            |
| Benicar HCT          | Antihypertensives         |
| Bentyl               | Antispasmodics            |
| bisoprolol           | Antihypertensives         |

|               |                   |
|---------------|-------------------|
| Blocadren     | Antihypertensives |
| brivaracetam  | Anticonvulsants   |
| Briviact      | Anticonvulsants   |
| bumetanide    | Antihypertensives |
| Bumex         | Antihypertensives |
| buprenorphine | Opioids           |
| bupropion     | Antidepressants   |

| Medication                 | Algorithm                 |
|----------------------------|---------------------------|
| Buspar                     | Antidepressants           |
| buspirone                  | Antidepressants           |
| butabarbital               | Sedative Hypnotics        |
| butalbital                 | Sedative Hypnotics        |
| Butisol                    | Sedative Hypnotics        |
| Butrans                    | Opioids                   |
| Bystolic                   | Antihypertensives         |
| <b>C</b>                   |                           |
| Caduet                     | Antihypertensives         |
| Calan                      | Antihypertensives         |
| carbamazepine              | Anticonvulsants           |
| Carbatrol                  | Anticonvulsants           |
| Cardene                    | Antihypertensives         |
| Cardizem                   | Antihypertensives         |
| Cardura                    | Antihypertensives         |
| carisoprodol               | Antispasmodics            |
| Cartia                     | Antihypertensives         |
| carvedilol                 | Antihypertensives         |
| Catapres                   | Antihypertensives         |
| Celexa                     | Antidepressants           |
| Celontin                   | Anticonvulsants           |
| Cerebryx                   | Anticonvulsants           |
| chlorazepate               | Benzodiazepines           |
| chlordiazepoxide           | Benzodiazepines           |
| chlorthiazide              | Antihypertensives         |
| chlorpromazine             | Antipsychotics            |
| chlorthalidone             | Antihypertensives         |
| chlorzoxazone              | Antispasmodics            |
| citalopram                 | Antidepressants           |
| clidinium-chloridazepoxide | Antispasmodics            |
| clobazam                   | Anticonvulsants           |
| clomipramine               | Tricyclic Antidepressants |
| clonazepam                 | Benzodiazepines           |
| clonidine                  | Antihypertensives         |
| clozapine                  | Antipsychotics            |
| Clozaril                   | Antipsychotics            |
| codeine                    | Opioids                   |
| Coreg                      | Antihypertensives         |
| Corgard                    | Antihypertensives         |
| cyclobenzaprine            | Antispasmodics            |
| Cymbalta                   | Antidepressants           |

| Medication           | Algorithm                 |
|----------------------|---------------------------|
| <b>D</b>             |                           |
| Dalmane              | Benzodiazepines           |
| Dantrium             | Antispasmodics            |
| dantrolene           | Antispasmodics            |
| darifenacin          | Antispasmodics            |
| Demadex              | Antihypertensives         |
| Demerol              | Opioids                   |
| Depakene             | Anticonvulsants           |
| Depakote             | Anticonvulsants           |
| desipramine          | Tricyclic Antidepressants |
| desvenlafaxine       | Antidepressants           |
| Desyrel              | Antidepressants           |
| Detrol               | Antispasmodics            |
| diazepam             | Benzodiazepines           |
| dicyclomine          | Antispasmodics            |
| Dilacor              | Antihypertensives         |
| Dilantin             | Anticonvulsants           |
| Dilaudid             | Opioids                   |
| diltiazem            | Antihypertensives         |
| Diltzac              | Antihypertensives         |
| Diovan HCT           | Antihypertensives         |
| diphenhydramine      | Sedative Hypnotics        |
| Ditropan             | Antispasmodics            |
| Diuril               | Antihypertensives         |
| divalproex sodium    | Anticonvulsants           |
| Dolophine            | Opioids                   |
| Donnatol             | Antispasmodics            |
| Doral                | Benzodiazepines           |
| doxazosin            | Antihypertensives         |
| doxepin              | Tricyclic Antidepressants |
| doxylamine           | Sedative Hypnotics        |
| duloxetine           | Antidepressants           |
| Duragesic            | Opioids                   |
| Dyazide              | Antihypertensives         |
| Dynacirc             | Antihypertensives         |
| Dyrenium             | Antihypertensives         |
| <b>E</b>             |                           |
| Effexor (Effexor XR) | Antidepressants           |
| Elavil               | Tricyclic Antidepressants |
| Enablex              | Antispasmodics            |

| Medication      | Algorithm                        |
|-----------------|----------------------------------|
| eplerenone      | Antihypertensives                |
| Equanil         | Sedative Hypnotics               |
| escitalopram    | Antidepressants                  |
| Esidrix         | Antihypertensives                |
| eslicarbazepine | Anticonvulsants                  |
| estazolam       | Benzodiazepines                  |
| eszopiclone     | Benzodiazepines                  |
| ethosuximide    | Anticonvulsants                  |
| Exforge         | Antihypertensives                |
| ezogabine       | Anticonvulsants                  |
| <b>F</b>        |                                  |
| Fanapt          | Antipsychotics                   |
| felbamate       | Anticonvulsants                  |
| Felbatol        | Anticonvulsants                  |
| felodipine      | Antihypertensives                |
| fentanyl        | Opioids                          |
| Fentora         | Opioids                          |
| fesoterodine    | Antispasmodics                   |
| Fetzima         | Antidepressants                  |
| Fioricet        | Sedative Hypnotics               |
| Fiorinal        | sedative hypotics                |
| flavoxate       | Antispasmodics                   |
| Flexeril        | Antispasmodics                   |
| fluoxetine      | Antidepressants & Antipsychotics |
| fluphenazine    | Antipsychotics                   |
| flurazepam      | Benzodiazepines                  |
| fluvoxamine     | Antidepressants                  |
| fosphenytoin    | Anticonvulsants                  |
| furosemide      | Antihypertensives                |
| Fycompa         | Anticonvulsants                  |
| <b>G</b>        |                                  |
| gabapentin      | Anticonvulsants                  |
| Gabitril        | Anticonvulsants                  |
| Geodon          | Antipsychotics                   |
| guanabenz       | Antihypertensives                |
| guanfacine      | Antihypertensives                |
| <b>H</b>        |                                  |
| Halcion         | Benzodiazepines                  |
| Haldol          | Antipsychotics                   |
| haloperidol     | Antipsychotics                   |

| Medication          | Algorithm                 |
|---------------------|---------------------------|
| hydralazine         | Antihypertensives         |
| hydrochlorothiazide | Antihypertensives         |
| hydrocodone         | Opioids                   |
| Hydrodiuril         | Antihypertensives         |
| hydromorphone       | Opioids                   |
| Hygroton            | Antihypertensives         |
| hyoscyamine         | Antispasmodics            |
| Hypovase            | Antihypertensives         |
| Hytrin              | Antihypertensives         |
| Hyzaar              | Antihypertensives         |
| <b>I</b>            |                           |
| iloperidone         | Antipsychotics            |
| imipramine          | Tricyclic Antidepressants |
| indapamide          | Antihypertensives         |
| Inderal             | Antihypertensives         |
| Innoproan           | Antihypertensives         |
| Inspira             | Antihypertensives         |
| Intuniv             | Antihypertensives         |
| Invega              | Antipsychotics            |
| isocarboxazid       | Antidepressants           |
| Isoptin             | Antihypertensives         |
| isradipine          | Antihypertensives         |
| <b>K</b>            |                           |
| Keppra              | Anticonvulsants           |
| Klonopin            | Benzodiazepines           |
| <b>L</b>            |                           |
| labetalol           | Antihypertensives         |
| lacosamide          | Anticonvulsants           |
| Lamictal            | Anticonvulsants           |
| lamotrigine         | Anticonvulsants           |
| Lasix               | Antihypertensives         |
| Latuda              | Antipsychotics            |
| Lentopres           | Antihypertensives         |
| Levatol             | Antihypertensives         |
| Levbid              | Antispasmodics            |
| levetiracetam       | Anticonvulsants           |
| Levo-Dromoran       | Opioids                   |
| levomilnacipran     | Antidepressants           |
| levorphanol         | Opioids                   |
| Levsin              | Antispasmodics            |

| Medication | Algorithm                 |
|------------|---------------------------|
| Levsinex   | Antispasmodics            |
| Lexapro    | Antidepressants           |
| Librax     | Antispasmodics            |
| Librax     | Benzodiazepines           |
| Librium    | Benzodiazepines           |
| Limbitrol  | Benzodiazepines           |
| Lioresal   | Antispasmodics            |
| Loniten    | Antihypertensives         |
| Lopressor  | Antihypertensives         |
| lorazepam  | Benzodiazepines           |
| Lorcet     | Opioids                   |
| Lortab     | Opioids                   |
| Lotrel     | Antihypertensives         |
| loxapine   | Antipsychotics            |
| Loxitane   | Antipsychotics            |
| Lozol      | Antihypertensives         |
| Ludomil    | Tricyclic Antidepressants |
| Lunesta    | Benzodiazepines           |
| lurasidone | Antipsychotics            |
| Luvox      | Antidepressants           |
| Lyrica     | Anticonvulsants           |

| M             |                           |
|---------------|---------------------------|
| maprotiline   | Tricyclic Antidepressants |
| Marplan       | Antidepressants           |
| Maxzide       | Antihypertensives         |
| Mellaril      | Antipsychotics            |
| meperidine    | Opioids                   |
| meprobamate   | Sedative Hypnotics        |
| metaxalone    | Antispasmodics            |
| methadone     | Opioids                   |
| methocarbamol | Antispasmodics            |
| methsuximide  | Anticonvulsants           |
| methyldopa    | Antihypertensives         |
| metolazone    | Antihypertensives         |
| metoprolol    | Antihypertensives         |
| Microzide     | Antihypertensives         |
| Midamor       | Antihypertensives         |
| Miltown       | Sedative Hypnotics        |
| Minipress     | Antihypertensives         |
| minoxidil     | Antihypertensives         |
| mirtazapine   | Antidepressants           |

| Medication    | Algorithm                 |
|---------------|---------------------------|
| Moban         | Antipsychotics            |
| molindone     | Antipsychotics            |
| morphine      | Opioids                   |
| MS Contin     | Opioids                   |
| Mysoline      | Anticonvulsants           |
| <b>N</b>      |                           |
| nadalol       | Antihypertensives         |
| Nardil        | Antidepressants           |
| Navane        | Antipsychotics            |
| Nebilet       | Antihypertensives         |
| nebivolol     | Antihypertensives         |
| nefazodone    | Antidepressants           |
| Nembutal      | Sedative Hypnotics        |
| Neurontin     | Anticonvulsants           |
| nicardipine   | Antihypertensives         |
| Nifedipine    | Antihypertensives         |
| nimodipine    | Antihypertensives         |
| Nimotop       | Antihypertensives         |
| nisoldipine   | Antihypertensives         |
| Norco         | Opioids                   |
| Norflex       | Antispasmodics            |
| Normodyne     | Antihypertensives         |
| Norpramine    | Tricyclic Antidepressants |
| nortriptyline | Tricyclic Antidepressants |
| Norvasc       | Antihypertensives         |
| Nucynta       | Opioids                   |
| <b>O</b>      |                           |
| olanzapine    | Antipsychotics            |
| Onfi          | Anticonvulsants           |
| Opana         | Opioids                   |
| Orap          | Antipsychotics            |
| Oretic        | Antihypertensives         |
| orphenadrine  | Antispasmodics            |
| oxazepam      | Benzodiazepines           |
| oxcarbazepine | Anticonvulsants           |
| oxybutynin    | Antispasmodics            |
| oxycodone     | Opioids                   |
| OxyContin     | Opioids                   |
| oxymorphone   | Opioids                   |
| <b>P</b>      |                           |

| Medication    | Algorithm                 |
|---------------|---------------------------|
| paliperidone  | Antipsychotics            |
| Pamelor       | Tricyclic Antidepressants |
| Paraflex      | Antispasmodics            |
| Parnate       | Antidepressants           |
| paroxetine    | Antidepressants           |
| Paxil         | Antidepressants           |
| penbutolol    | Antihypertensives         |
| pentobarbital | Sedative Hypnotics        |
| pentazocine   | Opioids                   |
| perampanel    | Anticonvulsants           |
| Percocet      | Opioids                   |
| Permitil      | Antipsychotics            |
| perphenazine  | Antipsychotics            |
| phenelzine    | Antidepressants           |
| phenobarbital | Anticonvulsants           |
| phenytoin     | Anticonvulsants           |
| pimozide      | Antipsychotics            |
| pindolol      | Antihypertensives         |
| Plendil       | Antihypertensives         |
| Potiga        | Anticonvulsants           |
| prazosin      | Antihypertensives         |
| pregabalin    | Anticonvulsants           |
| primidone     | Anticonvulsants           |
| Pristiq       | Antidepressants           |
| Pro-Banthine  | Antispasmodics            |
| Prolixin      | Antipsychotics            |
| propantheline | Antispasmodics            |
| propranolol   | Antihypertensives         |
| protriptyline | Tricyclic Antidepressants |
| Prozac        | Antidepressants           |
| <b>Q</b>      |                           |
| quazepam      | Benzodiazepines           |
| quetiapine    | Antipsychotics            |
| <b>R</b>      |                           |
| Raudixin      | Antihypertensives         |
| Remeron       | Antidepressants           |
| reserpine     | Antihypertensives         |
| Restoril      | Benzodiazepines           |
| Risperdal     | Antipsychotics            |
| risperidone   | Antipsychotics            |

| Medication     | Algorithm                 |
|----------------|---------------------------|
| Robaxin        | Antispasmodics            |
| Roxidone       | Opioids                   |
| rufinamide     | Anticonvulsants           |
| <b>S</b>       |                           |
| Sabril         | Anticonvulsants           |
| Sanctura       | Antispasmodics            |
| Sapris         | Antipsychotics            |
| Sarafem        | Antidepressants           |
| secobarbital   | Sedative Hypnotics        |
| Seconal        | Sedative Hypnotics        |
| Sectral        | Antihypertensives         |
| Serax          | Benzodiazepines           |
| Seroquel       | Antipsychotics            |
| Serpalan       | Antihypertensives         |
| Serpasil       | Antihypertensives         |
| sertraline     | Antidepressants           |
| Serzone        | Antidepressants           |
| Sinequan       | Tricyclic Antidepressants |
| Skelaxin       | Antispasmodics            |
| solifenacin    | Antispasmodics            |
| Soma           | Antispasmodics            |
| Sonata         | Benzodiazepines           |
| spironolactone | Antihypertensives         |
| Stelazine      | Antipsychotics            |
| Sular          | Antihypertensives         |
| Surmontil      | Tricyclic Antidepressants |
| Symbyax        | Antipsychotics            |
| <b>T</b>       |                           |
| tapentadol     | Opioids                   |
| Taztia         | Antihypertensives         |
| Tekturna HCT   | Antihypertensives         |
| Tegretol       | Anticonvulsants           |
| temazepam      | Benzodiazepines           |
| Tenex          | Antihypertensives         |
| Tenoretic      | Antihypertensives         |
| Tenormin       | Antihypertensives         |
| terazosin      | Antihypertensives         |
| Thalidone      | Antihypertensives         |
| thioridazine   | Antipsychotics            |
| thiothixene    | Antipsychotics            |

| Medication      | Algorithm                 |
|-----------------|---------------------------|
| Thorazine       | Antipsychotics            |
| tiagabine       | Anticonvulsants           |
| Tiazac          | Antihypertensives         |
| timolol         | Antihypertensives         |
| tizanidine      | Antispasmodics            |
| Tofranil        | Tricyclic Antidepressants |
| tolterodine     | Antispasmodics            |
| Topamax         | Anticonvulsants           |
| topiramate      | Anticonvulsants           |
| Toprol XL       | Antihypertensives         |
| torsemide       | Antihypertensives         |
| Toviaz          | Antispasmodics            |
| Trancot         | Sedative Hypnotics        |
| Trandate        | Antihypertensives         |
| Tranxene        | Benzodiazepines           |
| tranylcypromine | Antidepressants           |
| trazodone       | Antidepressants           |
| triamterene     | Antihypertensives         |
| triazolam       | Benzodiazepines           |
| Tribenzor       | Antihypertensives         |
| Tridione        | Anticonvulsants           |
| trifluoperazine | Antipsychotics            |
| Trilafon        | Antipsychotics            |
| Trileptal       | Anticonvulsants           |
| trimethadione   | Anticonvulsants           |
| trimipramine    | Tricyclic Antidepressants |
| tropium         | Antispasmodics            |
| Tussionex       | Opioids                   |
| Tylenol #3      | Opioids                   |
| <b>U</b>        |                           |
| Urispas         | Antispasmodics            |
| <b>V</b>        |                           |
| Valium          | Benzodiazepines           |
| valproate       | Anticonvulsants           |
| Vasoflex        | Antihypertensives         |
| venlafaxine     | Antidepressants           |
| verapamil       | Antihypertensives         |
| Vesicare        | Antispasmodics            |
| Vicodin         | Opioids                   |
| Vicoprofen      | Opioids                   |

| Medication               | Algorithm                 |
|--------------------------|---------------------------|
| vigabatrin               | Anticonvulsants           |
| Viibryd                  | Antidepressants           |
| vilazodone               | Antidepressants           |
| Vimpat                   | Anticonvulsants           |
| Visken                   | Antihypertensives         |
| Vivactil                 | Tricyclic Antidepressants |
| <b>W</b>                 |                           |
| Wellbutrin/Wellbutrin SR | Antidepressants           |
| Wytensin                 | Antihypertensives         |
| <b>X</b>                 |                           |
| Xanax                    | Benzodiazepines           |
| <b>Z</b>                 |                           |
| zaleplon                 | Benzodiazepines           |
| Zanaflex                 | Antispasmodics            |
| Zarotin                  | Anticonvulsants           |
| Zaroxolyn                | Antihypertensives         |
| Zayasel                  | Antihypertensives         |
| Zebeta                   | Antihypertensives         |
| Ziac                     | Antihypertensives         |
| ziprasidone              | Antipsychotics            |
| Zoloft                   | Antidepressants           |
| zolpidem                 | Benzodiazepines           |
| Zonegran                 | Anticonvulsants           |
| zonisamide               | Anticonvulsants           |
| Zyprexa                  | Antipsychotics            |

**Figure S3:** Medication review checklist

## FALLS RISK CMR CHECKLIST

Patient: \_\_\_\_\_ DOB: \_\_\_\_\_ Date: \_\_\_\_\_

| FALLS RISK FACTOR(S) IDENTIFIED                                                   | FACTOR PRESENT?                                          | NOTES |
|-----------------------------------------------------------------------------------|----------------------------------------------------------|-------|
| <b>FALLS HISTORY</b>                                                              |                                                          |       |
| Any falls in the past year?                                                       | <input type="checkbox"/> Yes <input type="checkbox"/> No |       |
| Worries about falling?                                                            | <input type="checkbox"/> Yes <input type="checkbox"/> No |       |
| Feels unsteady when standing or walking?                                          | <input type="checkbox"/> Yes <input type="checkbox"/> No |       |
| <b>POSTURAL HYPOTENSION</b>                                                       |                                                          |       |
| Patient reported symptoms of lightheadedness or dizziness from lying to standing? | <input type="checkbox"/> Yes <input type="checkbox"/> No |       |

  

| DRUG CLASSES WITH FALLS RISK | MEDICATION(S) NAME/DOSE/DIRECTIONS | PRESCRIBER |
|------------------------------|------------------------------------|------------|
| Anticonvulsant agents        |                                    |            |
| Antidepressant agents        |                                    |            |
| Antihypertensive agents      |                                    |            |
| Antipsychotic agents         |                                    |            |
| Antispasmodic agents         |                                    |            |
| Benzodiazepines              |                                    |            |
| Opioids                      |                                    |            |
| Sedative hypnotics           |                                    |            |
| Tricyclic antidepressants    |                                    |            |
| Other                        |                                    |            |

  

| OTHER DRUG THERAPY PROBLEMS (DTPS) MEDICATION(S) NAME/DOSE/DIRECTIONS | PRESCRIBER |
|-----------------------------------------------------------------------|------------|
|                                                                       |            |
|                                                                       |            |

Figure S4: Prescriber marketing flyer

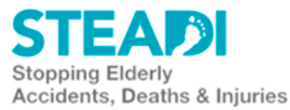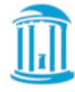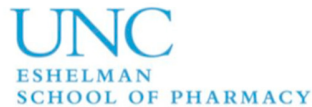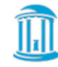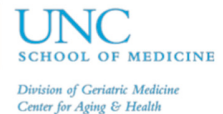

## HELP US PREVENT FALLS IN YOUR OLDER ADULT PATIENTS

What does this mean for your practice?

- This is a pharmacy service supported by a grant from the Centers for Disease Control and Prevention to reduce the risk of falls in older adults through interprofessional collaboration.
- Through collaboration with your community pharmacy, you can meet your quality metrics (e.g. HEDIS measures, annual wellness visits)!
- You may receive a communication from a community pharmacy when they have identified an older adult at increased risk for falling.
- We request you review the pharmacist's recommendations and send your response back to the pharmacy.

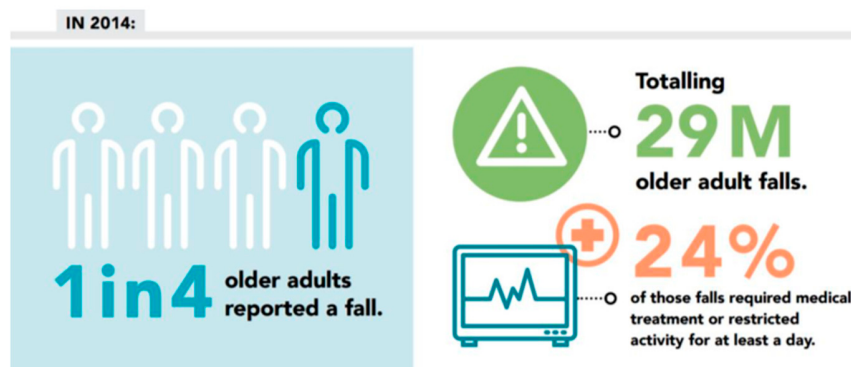

STEADI. Centers for Disease Control and Prevention.

How it works:

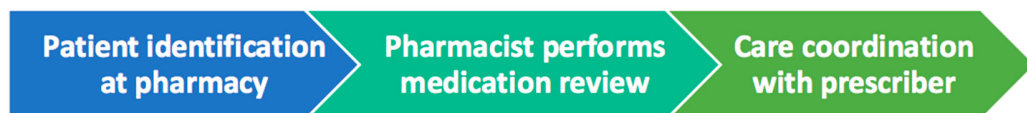

**Table S3:** North Carolina community-based fall prevention resources

## **Community-Based Falls Prevention Resources**

## Eastern NC

- **Healthy Aging NC – A Matter of Balance**

- Description: a structured, group intervention that utilizes a variety of activities to address physical and cognitive factors affecting fear of falling and to teach fall prevention strategies. Consists of eight 2-hour-long sessions, most including a 30-minute exercise component.
- Location(s): Williamston, NC
- Website: <http://healthyagingnc.com/workshop/a-matter-of-balance/>
- E-mail: [healthyagingncinfo@gmail.com](mailto:healthyagingncinfo@gmail.com)
- Phone: 828-258-7712

- **Otago Exercise Program**

- Description: an individualized balance and strength fall prevention program that is delivered by a physical therapist over the course of 52 weeks. Designed to benefit older adults who have sustained falls in the past, have difficulty with gait, balance, or leg strength, and are limited in activities because of concerns of falling.
- Location(s): Greenville, Kinston, Manteo, Nags Head, Oriental, Rocky Point, Whiteville, Wilmington, Windsor
- Website: <http://healthyagingnc.com/workshop/otago-exercise-program/>
- E-mail: [healthyagingncinfo@gmail.com](mailto:healthyagingncinfo@gmail.com)
- Phone: 828-258-7712

- **Silver Sneakers**

- A program sponsored by several participating health plans that provides free access to gyms, exercise classes, and other benefits to adults over the age of 65. See website for locations and offerings near you, and to check your patients' eligibility.
- Location(s): hundreds of locations statewide
- Website: <https://www.silversneakers.com/>
- E-mail: [support@silversneakers.com](mailto:support@silversneakers.com)
- Phone: 866-584-7389

- **More Resources**

- Healthy Aging NC is looking to be a one-stop shop for evidence-based community-based falls prevention programs. They are continually updating their website to include a complete listing of programs, so check back regularly!
  - Website: <http://healthyagingnc.com/falls-prevention-workshops/>
  - E-mail: [healthyagingncinfo@gmail.com](mailto:healthyagingncinfo@gmail.com)
  - Phone: 828-258-7712

## Central NC

- **Healthy Aging NC – A Matter of Balance**
  - Description: a structured, group intervention that utilizes a variety of activities to address physical and cognitive factors affecting fear of falling and to teach fall prevention strategies. Consists of eight 2-hour-long sessions, most including a 30-minute exercise component.
  - Location(s): Creedmoor, Fayetteville, Lexington, Stovall, Wadesboro, Wagram
  - Website: <http://healthyagingnc.com/workshop/a-matter-of-balance/>
  - E-mail: [healthyagingncinfo@gmail.com](mailto:healthyagingncinfo@gmail.com)
  - Phone: 828-258-7712
- **YMCA: Moving for Better Balance**
  - Description: a 12-week evidence-based falls prevention program using the principles and movements of Tai Chi to help older adults increase their strength, improve their balance, and increase their confidence in doing everyday activities.
  - Location(s): Durham, Chapel Hill
  - Website: <http://healthyagingnc.com/workshop/ymca-moving-better-balance/>
  - E-mail: [healthyagingncinfo@gmail.com](mailto:healthyagingncinfo@gmail.com)
  - Phone: 828-258-7712
- **Fit & Strong!**
  - Description: an 8-week multi-component exercise program aimed at older adults with lower extremity osteoarthritis.
  - Location(s): Mayodan, Raleigh, Troy
  - Website: <https://www.fitandstrong.org/index.html>
  - E-mail: see "Contact Us" form on website
  - Phone: 312-413-9810
- **Otago Exercise Program**
  - Description: an individualized balance and strength fall prevention program that is delivered by a physical therapist over the course of 52 weeks. Designed to benefit older adults who have sustained falls in the past, have difficulty with gait, balance, or leg strength, and are limited in activities because of concerns of falling.
  - Location(s): Asheboro, Benson, Burlington, Buies Creek, Carrboro, Chapel Hill, Durham, Elon, Fuquay-Varina, Greensboro, Hillsborough, Lexington, Morrisville, Pinehurst, Pittsboro, Raeford, Raleigh, Reidsville, Rocky Mount, Roxboro, Sanford, Taylortown, West End, Winston-Salem
  - Website: <http://healthyagingnc.com/workshop/otago-exercise-program/>
  - E-mail: [healthyagingncinfo@gmail.com](mailto:healthyagingncinfo@gmail.com)
  - Phone: 828-258-7712

## Central NC, continued

- **Silver Sneakers**

- A program sponsored by several participating health plans that provides free access to gyms, exercise classes, and other benefits to adults over the age of 65. See website for locations and offerings near you, and to check your patients' eligibility.
- Location(s): hundreds of locations statewide
- Website: <https://www.silversneakers.com/>
- E-mail: [support@silversneakers.com](mailto:support@silversneakers.com)
- Phone: 866-584-7389

- **More Resources**

- Healthy Aging NC is looking to be a one-stop shop for evidence-based community-based falls prevention programs. They are continually updating their website to include a complete listing of programs, so check back regularly!
  - Website: <http://healthyagingnc.com/falls-prevention-workshops/>
  - E-mail: [healthyagingncinfo@gmail.com](mailto:healthyagingncinfo@gmail.com)
  - Phone: 828-258-7712

## Western NC

- **Healthy Aging NC – A Matter of Balance**
  - Description: a structured, group intervention that utilizes a variety of activities to address physical and cognitive factors affecting fear of falling and to teach fall prevention strategies. Consists of eight 2-hour-long sessions, most including a 30-minute exercise component.
  - Location(s): Asheville, Black Mountain, Charlotte, Gastonia, Huntersville, Kannapolis, Lincolnton, Marshall, Mooresville, Woodfin
  - Website: <http://healthyagingnc.com/workshop/a-matter-of-balance/>
  - E-mail: [healthyagingncinfo@gmail.com](mailto:healthyagingncinfo@gmail.com)
  - Phone: 828-258-7712
- **YMCA: Moving for Better Balance**
  - Description: a 12-week evidence-based falls prevention program using the principles and movements of Tai Chi to help older adults increase their strength, improve their balance, and increase their confidence in doing everyday activities.
  - Location(s): Asheville, North Wilkesboro
  - Website: <http://healthyagingnc.com/workshop/ymca-moving-better-balance/>
  - E-mail: [healthyagingncinfo@gmail.com](mailto:healthyagingncinfo@gmail.com)
  - Phone: 828-258-7712
- **Fit & Strong!**
  - Description: an 8-week multi-component exercise program aimed at older adults with lower extremity osteoarthritis.
  - Location(s): Charlotte
  - Website: <https://www.fitandstrong.org/index.html>
  - E-mail: see "Contact Us" form on website
  - Phone: 312-413-9810
- **Otago Exercise Program**
  - Description: an individualized balance and strength fall prevention program that is delivered by a physical therapist over the course of 52 weeks. Designed to benefit older adults who have sustained falls in the past, have difficulty with gait, balance, or leg strength, and are limited in activities because of concerns of falling.
  - Location(s): Belmont, Boone, Charlotte, Columbus, Cullowhee, Franklin, Hendersonville, Hickory, Huntersville, Lenoir, Matthews, Newton, Robbinsville, Salisbury, Valdese, Waynesville
  - Website: <http://healthyagingnc.com/workshop/otago-exercise-program/>
  - E-mail: [healthyagingncinfo@gmail.com](mailto:healthyagingncinfo@gmail.com)
  - Phone: 828-258-7712

## Western NC, continued

- **Housing Assistance Corporation Fall Prevention Program**
  - Description: educates low-income elderly and disabled people on the risks and prevention of falling and completes modifications and safety upgrades to their homes so they may remain living independently
  - Location(s): Hendersonville
  - Website: [www.housing-assistance.com](http://www.housing-assistance.com)
  - Phone: 828-692-4744
- **Pleasant Gardens Baptist Church Fall Prevention**
  - Description: Volunteers from the Fishers of Men Sunday School build wheelchair ramps for McDowell County residents.
  - Location(s): Marion
  - Phone: 828-724-4383
  -
- **WNC Fall Prevention Coalition**
  - Description: a listing of resources related to community screening and referrals for falls prevention services in Western North Carolina
  - Website: <http://wncfallpreventioncoalition.org/community-screening-referrals/>
  - E-mail: use "Contact Us" form on website
- **Silver Sneakers**
  - A program sponsored by several participating health plans that provides free access to gyms, exercise classes, and other benefits to adults over the age of 65. See website for locations and offerings near you, and to check your patients' eligibility.
  - Location(s): hundreds of locations statewide
  - Website: <https://www.silversneakers.com/>
  - E-mail: [support@silversneakers.com](mailto:support@silversneakers.com)
  - Phone: 866-584-7389
- **More Resources**
  - Healthy Aging NC is looking to be a one-stop shop for evidence-based community-based falls prevention programs. They are continually updating their website to include a complete listing of programs, so check back regularly!
    - Website: <http://healthyagingnc.com/falls-prevention-workshops/>
    - E-mail: [healthyagingncinfo@gmail.com](mailto:healthyagingncinfo@gmail.com)
    - Phone: 828-258-7712

**Table S4:** Project champion survey

Please provide contact information for the project lead at [your pharmacy].

*The project lead is the person who was responsible for ensuring that the Falls Risk Study was implemented at your pharmacy.*

☐ First Name \_\_\_\_\_

☐ Last Name \_\_\_\_\_

☐ Email Address \_\_\_\_\_

---

Are you the project lead?

☐ Yes (1)

☐ No (2)

What is your role at [your pharmacy]?

☐ Technician

☐ Student Intern

☐ Pharmacist

☐ Non-Clinical Employee (e.g., office manager)

☐ Owner

☐ Other (Please Specify) \_\_\_\_\_

---

What education or certifications do you hold? (Check all that apply)

- ☐ Certified Technician (CPhT)
  - ☐ Bachelor of Science in Pharmacy (BS Pharm)
  - ☐ Doctor of Pharmacy (PharmD)
  - ☐ Residency-Trained
  - ☐ Board Certification (Please Specify)
  - ☐ Clinical Pharmacy Practitioner (CPP)
  - ☐ Other (Please Specify)
- 

For how many years have you worked at [your pharmacy]?

*If you work at multiple locations within a pharmacy chain, please consider only years worked in the pharmacy location specified above.*

- ☐ < 1 year
- ☐ 1-5 years
- ☐ > 5 years

Please rate the usefulness of resources and tools used to conduct a medication review.

|                                 | Did Not Use (0)       | Not Useful (1)        | Somewhat Useful<br>(2) | Very Useful (3)       |
|---------------------------------|-----------------------|-----------------------|------------------------|-----------------------|
| Medication Checklist            | <input type="radio"/> | <input type="radio"/> | <input type="radio"/>  | <input type="radio"/> |
| High-Risk Medication Index      | <input type="radio"/> | <input type="radio"/> | <input type="radio"/>  | <input type="radio"/> |
| High-Risk Medication Algorithms | <input type="radio"/> | <input type="radio"/> | <input type="radio"/>  | <input type="radio"/> |
| Patient Education Brochures     | <input type="radio"/> | <input type="radio"/> | <input type="radio"/>  | <input type="radio"/> |
| Community Resources             | <input type="radio"/> | <input type="radio"/> | <input type="radio"/>  | <input type="radio"/> |
| Prescriber Flyer                | <input type="radio"/> | <input type="radio"/> | <input type="radio"/>  | <input type="radio"/> |
| Other (Please Specify)          | <input type="radio"/> | <input type="radio"/> | <input type="radio"/>  | <input type="radio"/> |

Please rate the usefulness of tools to share recommendations with prescribers.

|                               | Did Not Use (0)       | Not Useful (1)        | Somewhat Useful<br>(2) | Very Useful (3)       |
|-------------------------------|-----------------------|-----------------------|------------------------|-----------------------|
| Cover Fax                     | <input type="radio"/> | <input type="radio"/> | <input type="radio"/>  | <input type="radio"/> |
| Prescriber Communication Form | <input type="radio"/> | <input type="radio"/> | <input type="radio"/>  | <input type="radio"/> |
| Prescriber Response Form      | <input type="radio"/> | <input type="radio"/> | <input type="radio"/>  | <input type="radio"/> |

Please rate the usefulness of the training activities.

|                                 | Did not<br>participate (0) | Not Useful (1)        | Somewhat Useful<br>(2) | Very Useful (3)       |
|---------------------------------|----------------------------|-----------------------|------------------------|-----------------------|
| On-boarding<br>Training Webinar | <input type="radio"/>      | <input type="radio"/> | <input type="radio"/>  | <input type="radio"/> |
| NCAP 2017<br>Workshop           | <input type="radio"/>      | <input type="radio"/> | <input type="radio"/>  | <input type="radio"/> |
| Site Visit                      | <input type="radio"/>      | <input type="radio"/> | <input type="radio"/>  | <input type="radio"/> |
| Coaching                        | <input type="radio"/>      | <input type="radio"/> | <input type="radio"/>  | <input type="radio"/> |
| APhA CPE<br>Program             | <input type="radio"/>      | <input type="radio"/> | <input type="radio"/>  | <input type="radio"/> |
| Quick Tips<br>Emails            | <input type="radio"/>      | <input type="radio"/> | <input type="radio"/>  | <input type="radio"/> |
| Quick Tips<br>Webinars          | <input type="radio"/>      | <input type="radio"/> | <input type="radio"/>  | <input type="radio"/> |

Please rate the usefulness of webinar topics.

|                                   | Did Not<br>Participate (0) | Not Useful (1)        | Somewhat Useful<br>(2) | Very Useful (3)       |
|-----------------------------------|----------------------------|-----------------------|------------------------|-----------------------|
| Workflow<br>integration           | <input type="radio"/>      | <input type="radio"/> | <input type="radio"/>  | <input type="radio"/> |
| Engaging with<br>patients         | <input type="radio"/>      | <input type="radio"/> | <input type="radio"/>  | <input type="radio"/> |
| Engaging with<br>prescribers      | <input type="radio"/>      | <input type="radio"/> | <input type="radio"/>  | <input type="radio"/> |
| Examples from<br>other pharmacies | <input type="radio"/>      | <input type="radio"/> | <input type="radio"/>  | <input type="radio"/> |
